# Supplementary material
Source: PubMed Central journal article supplement (PMC4330107)
Supplement: NIHMS658043-supplement-Supp_DataS1.pdf [file NIHMS658043-supplement-Supp_DataS1.pdf]

**Data Supplement. Detailed Results From Model 2.** The association of substance use disorders with categories of injury, adjusted for time, demographic factors, and psychiatric and medical history: incident rate ratios (IRRs)

| <i>Outcome</i>                       | <i>Variable</i>               | <i>Label</i>           | <i>IRR</i>   | <i>95% CI</i>     |
|--------------------------------------|-------------------------------|------------------------|--------------|-------------------|
| <b>Motor vehicle crash</b>           | <b>Substance use disorder</b> | <b>Yes</b>             | <b>1.50</b>  | <b>1.48, 1.52</b> |
|                                      | Public insurance              | Yes                    | 0.84         | 0.84, 0.85        |
|                                      | Age categories, yrs           | 40+                    | 0.64         | 0.63, 0.65        |
|                                      |                               | 35-39                  | 0.51         | 0.50, 0.52        |
|                                      |                               | 30-34                  | 0.46         | 0.45, 0.47        |
|                                      |                               | 25-29                  | 0.56         | 0.55, 0.57        |
|                                      |                               | 20-24                  | 0.75         | 0.74, 0.76        |
|                                      |                               | 18-19                  | 0.90         | 0.89, 0.92        |
|                                      | Race/ethnicity                | Other race             | 1.27         | 1.25, 1.29        |
|                                      |                               | Hispanic               | 1.37         | 1.36, 1.39        |
|                                      |                               | Black                  | 1.97         | 1.95, 2.00        |
|                                      |                               | Asian/Pacific Islander | 1.36         | 1.33, 1.40        |
| Psychiatric history                  | Yes                           | 0.78                   | 0.78, 0.79   |                   |
| Complex/chronic illness              | Yes                           | 0.63                   | 0.62, 0.63   |                   |
| <b>Falls</b>                         | <b>Substance use disorder</b> | <b>Yes</b>             | <b>1.69</b>  | <b>1.67, 1.71</b> |
|                                      | Public insurance              | Yes                    | 1.16         | 1.15, 1.17        |
|                                      | Age categories, yrs           | 40+                    | 1.20         | 1.18-1.22         |
|                                      |                               | 35-39                  | 0.76         | 0.74-0.77         |
|                                      |                               | 30-34                  | 0.61         | 0.60, 0.62        |
|                                      |                               | 25-29                  | 0.64         | 0.63, 0.65        |
|                                      |                               | 20-24                  | 0.71         | 0.69, 0.72        |
|                                      |                               | 18-19                  | 0.77         | 0.75, 0.78        |
|                                      | Race/ethnicity                | Other race             | 0.76         | 0.74, 0.77        |
|                                      |                               | Hispanic               | 0.70         | 0.69, 0.71        |
|                                      |                               | Black                  | 0.68         | 0.67, 0.69        |
|                                      |                               | Asian/Pacific Islander | 0.63         | 0.61, 0.65        |
| Psychiatric history                  | Yes                           | 0.90                   | 0.89, 0.91   |                   |
| Complex/chronic illness              | Yes                           | 0.73                   | 0.73, 0.74   |                   |
| <b>Suicide/self-inflicted Injury</b> | <b>Substance use disorder</b> | <b>Yes</b>             | <b>3.74</b>  | <b>3.65, 3.84</b> |
|                                      | Public insurance              | Yes                    | 0.91         | 0.89, 0.93        |
|                                      | Age categories, yrs           | 40+                    | 0.29         | 0.28, 0.30        |
|                                      |                               | 35-39                  | 0.26         | 0.25, 0.27        |
|                                      |                               | 30-34                  | 0.27         | 0.25, 0.28        |
|                                      |                               | 25-29                  | 0.29         | 0.28, 0.30        |
|                                      |                               | 20-24                  | 0.35         | 0.34, 0.36        |
|                                      |                               | 18-19                  | 0.48         | 0.46, 0.51        |
|                                      | Race/ethnicity                | Other race             | 0.96         | 0.92, 1.00        |
|                                      |                               | Hispanic               | 0.94         | 0.91, 0.98        |
|                                      |                               | Black                  | 0.74         | 0.70, 0.78        |
|                                      |                               | Asian/Pacific Islander | 1.48         | 1.35, 1.61        |
| Psychiatric history                  | Yes                           | 25.41                  | 24.19, 26.69 |                   |
| Complex/chronic illness              | Yes                           | 0.75                   | 0.73, 0.77   |                   |

**Data Supplement. Model 2 details, continued.**

| <i>Outcome</i>                                         | <i>Variable</i>               | <i>Label</i>           | <i>RR</i>   | <i>95% CI</i>     |
|--------------------------------------------------------|-------------------------------|------------------------|-------------|-------------------|
| <b>Homicide/<br/>purposefully inflicted<br/>Injury</b> | <b>Substance use disorder</b> | <b>Yes</b>             | <b>3.30</b> | <b>3.22, 3.37</b> |
|                                                        | Public insurance              | Yes                    | 1.64        | 1.61, 1.67        |
|                                                        | Age categories, yrs           | 40+                    | 0.41        | 0.39, 0.42        |
|                                                        |                               | 35-39                  | 0.39        | 0.38, 0.40        |
|                                                        |                               | 30-34                  | 0.39        | 0.38, 0.41        |
|                                                        |                               | 25-29                  | 0.47        | 0.45, 0.48        |
|                                                        |                               | 20-24                  | 0.64        | 0.62, 0.66        |
|                                                        |                               | 18-19                  | 0.77        | 0.75, 0.80        |
|                                                        | Race/ethnicity                | Other race             | 1.32        | 1.28, 1.37        |
|                                                        |                               | Hispanic               | 1.41        | 1.37, 1.44        |
|                                                        |                               | Black                  | 2.03        | 1.98, 2.09        |
|                                                        |                               | Asian/Pacific Islander | 1.04        | 0.97, 1.11        |
|                                                        | Psychiatric history           | Yes                    | 1.40        | 1.37, 1.43        |
|                                                        | Complex/chronic illness       | Yes                    | 0.79        | 0.77, 0.81        |
| <b>Any marker<br/>injury (1-4)</b>                     | <b>Substance use disorder</b> | <b>Yes</b>             | <b>1.59</b> | <b>1.58, 1.61</b> |
|                                                        | Public insurance              | Yes                    | 0.96        | 0.96, 0.97        |
|                                                        | Age categories, yrs           | 40+                    | 0.83        | 0.82, 0.84        |
|                                                        |                               | 35-39                  | 0.57        | 0.56, 0.58        |
|                                                        |                               | 30-34                  | 0.49        | 0.48, 0.49        |
|                                                        |                               | 25-29                  | 0.55        | 0.55, 0.56        |
|                                                        |                               | 20-24                  | 0.69        | 0.68, 0.69        |
|                                                        |                               | 18-19                  | 0.80        | 0.79, 0.82        |
|                                                        | Race/ethnicity                | Other race             | 0.99        | 0.97, 1.00        |
|                                                        |                               | Hispanic               | 1.03        | 1.02, 1.04        |
|                                                        |                               | Black                  | 1.18        | 1.17, 1.19        |
|                                                        |                               | Asian/Pacific Islander | 1.05        | 1.03, 1.07        |
|                                                        | Psychiatric history           | Yes                    | 0.89        | 0.89, 0.90        |
|                                                        | Complex/chronic illness       | Yes                    | 0.63        | 0.62, 0.63        |
| <b>Any injury</b>                                      | <b>Substance use disorder</b> | <b>Yes</b>             | <b>1.22</b> | <b>1.21, 1.23</b> |
|                                                        | Public insurance              | Yes                    | 0.94        | 0.94, 0.95        |
|                                                        | Age categories, yrs           | 40+                    | 0.97        | 0.96, 0.97        |
|                                                        |                               | 35-39                  | 0.62        | 0.62, 0.63        |
|                                                        |                               | 30-34                  | 0.51        | 0.51, 0.52        |
|                                                        |                               | 25-29                  | 0.56        | 0.56, 0.57        |
|                                                        |                               | 20-24                  | 0.67        | 0.66, 0.67        |
|                                                        |                               | 18-19                  | 0.75        | 0.74, 0.76        |
|                                                        | Race/ethnicity                | Other race             | 0.81        | 0.80, 0.82        |
|                                                        |                               | Hispanic               | 0.80        | 0.80, 0.81        |
|                                                        |                               | Black                  | 0.86        | 0.86, 0.87        |
|                                                        |                               | Asian/Pacific Islander | 0.91        | 0.90, 0.93        |
|                                                        | Psychiatric history           | Yes                    | 0.72        | 0.71, 0.72        |
|                                                        | Complex/chronic illness       | Yes                    | 0.58        | 0.58, 0.59        |
